# Supplementary material
Source: PubMed Central journal article supplement (PMC6055474)

**Appendix**  
**Smoking Cessation for Smokers Not Ready to Quit: Meta-analysis and Cost-effectiveness Analysis**  
**All et al.**

**Appendix Table 1.** Summary of Studies Assessing Interventions for SNRTQ (2000–2011, Asfar)

| Reference, country                 | Sample size | Eligibility criteria                                                                                                                                                                          | Control/treatment conditions                                           | Other treatment components                         | Follow-up (months) | Outcome                | Smoking abstinence treatment %(n/N) | Smoking abstinence control %(n/N) | Effect size OR (95% CI) |
|------------------------------------|-------------|-----------------------------------------------------------------------------------------------------------------------------------------------------------------------------------------------|------------------------------------------------------------------------|----------------------------------------------------|--------------------|------------------------|-------------------------------------|-----------------------------------|-------------------------|
| Pharmacologic interventions        |             |                                                                                                                                                                                               |                                                                        |                                                    |                    |                        |                                     |                                   |                         |
| Bolliger et al., 2000; Switzerland | 400         | Smoke $\geq 15$ CPD for $\geq 3$ years, have an exhaled-air CO level of at least 10 ppm, failed at least 1 serious quit attempt in past 12 months, unwilling or unable to quit at recruitment | Placebo; nicotine inhaler for 18 months                                | All subjects receive health information on smoking | 24                 | PP <sup>a</sup>        | 10.5% (21/200)                      | 8.5% (17/200)                     | 1.26 (0.65, 2.47)       |
| Wennike et al., 2003; Denmark      | 411         | Smoke $\geq 15$ CPD for $\geq 3$ years, failed at least 1 serious quit attempt in past 2 years, have an exhaled-air CO level of at least 15 ppm, not intending to quit in next month          | Placebo; nicotine gum for 12 months, randomized to 2 mg or 4 mg pieces | All subjects receive reduction information         | 24                 | PP <sup>a</sup>        | 9% (19/205)                         | 3% (7/206)                        | 2.90 (1.19, 7.07)       |
| Etter et al., 2004; Switzerland    | 534         | Smoke $\geq 20$ CPD, not intending to quit in next 6 months                                                                                                                                   | Placebo; NRT (free choice; patch, inhaler, or gum) for 6 months        | All subjects receive 20-page booklets on reduction | 26                 | 30-day CA              | 11.7% (31/265)                      | 9.3% (25/269)                     | 1.29 (0.74, 2.26)       |
| Hatsukami et al., 2004; U.S.       | 594         | Smoke $\geq 20$ CPD, not quit for $>3$ months in previous year,                                                                                                                               | Placebo; Bupropion for 26 weeks                                        | All subjects receive written materials on          | 6                  | 30-day CA <sup>a</sup> | 7% (20/295)                         | 5% (16/299)                       | 1.29 (0.65, 2.53)       |

**Appendix**  
**Smoking Cessation for Smokers Not Ready to Quit: Meta-analysis and Cost-effectiveness Analysis**  
**All et al.**

|                                 |     | have at least 2 failed quit attempts including 1 with NRT                                                                                                                                                |                                                                                        | reduction. Additional treatment offered if a quit date is set |                       |                 |               |                    |                   |
|---------------------------------|-----|----------------------------------------------------------------------------------------------------------------------------------------------------------------------------------------------------------|----------------------------------------------------------------------------------------|---------------------------------------------------------------|-----------------------|-----------------|---------------|--------------------|-------------------|
| Batra et al., 2005<br>Germany   | 364 | Smoke >20 CPD for ≥3 years, have an expired-air CO level of at least 15 ppm, have at least 1 failed quit attempt within 2 years but not within the previous 6 months Not intending to quit in next month | Placebo; 4 mg nicotine gum for 12 months                                               | 13                                                            | 1-day PP <sup>a</sup> | 12% (22/184)    | 5% (8/180)    | 2.92 (1.26, 6.74)  |                   |
| Rennard et al., 2006;<br>U.S.   | 429 | Smoke ≥20 CPD for ≥3 years, failed at least 1 serious quit attempt in past 2 years, exhaled-air CO level of at least 15 ppm, not intending to quit in next month                                         | Placebo; nicotine inhaler for 12 months                                                | 15                                                            | PP <sup>a</sup>       | 8% (17/215)     | 2% (3/214)    | 6.04 (1.74, 20.92) |                   |
| <b>Behavioral interventions</b> |     |                                                                                                                                                                                                          |                                                                                        |                                                               |                       |                 |               |                    |                   |
| Glasgow et al., 2009;<br>U.S.   | 320 | Age ≥18 years, currently ≥10 CPD, scheduled for outpatient surgery or diagnostic procedure, not                                                                                                          | Enhanced usual care (generic newsletters); telephone counseling + tailored newsletters | –                                                             | 12                    | PP <sup>a</sup> | 6.7% (11/164) | 4.4% (7/156)       | 1.53 (0.58, 4.05) |

**Appendix**  
**Smoking Cessation for Smokers Not Ready to Quit: Meta-analysis and Cost-effectiveness Analysis**  
**All et al.**

|                                                             |     | interested in quitting, can read/understand English                                                            |                                                                                                                                                                                                          |                                                                                                |    |                 |              |            |                   |  |  |
|-------------------------------------------------------------|-----|----------------------------------------------------------------------------------------------------------------|----------------------------------------------------------------------------------------------------------------------------------------------------------------------------------------------------------|------------------------------------------------------------------------------------------------|----|-----------------|--------------|------------|-------------------|--|--|
| Combination of behavioral and pharmacological interventions |     |                                                                                                                |                                                                                                                                                                                                          |                                                                                                |    |                 |              |            |                   |  |  |
| Carpenter et al., 2003; U.S.                                | 67  | Smoke $\geq 10$ CPD, interest in quitting eventually but not in next 30 days, at least 1 previous quit attempt | Usual care (i.e., brief advice to quit); smoking reduction + free choice of NRT (gum or patches) for 6 months + brief advice to quit                                                                     | All subjects received brief advice to quit. Additional treatment offered if a quit date is set | 6  | PP <sup>a</sup> | 13% (4/32)   | 9% (3/35)  | 1.52 (0.31, 7.40) |  |  |
| Carpenter et al., 2004; U.S. <sup>b</sup>                   | 616 | Smoke $\geq 10$ CPD, no interest in quitting                                                                   | No intervention; Arm 1: smoking reduction + free choice of NRT (gum or patches) for 6 months + brief advice to quit; Arm 2: Motivational intervention (brief advice to quit + NRT if a quit date is set) | –                                                                                              | 6  | PP <sup>a</sup> | 20% (83/409) | 4% (9/207) | 4.65 (2.18, 9.91) |  |  |
| Joseph et al., 2008; U.S.                                   | 152 | Smokers with cardiovascular disease, not interested in quitting in next 30 days                                | Usual care (i.e., brief advice to quit); rate reduction + nicotine gum for 18 months                                                                                                                     | –                                                                                              | 18 | PP <sup>a</sup> | 12% (9/78)   | 12% (9/74) | 0.94 (0.35, 2.52) |  |  |

*Note:* Original table published in Asfar et al. (2011); where statistics vary from original published papers, we present those from the original studies. ORs and 95% CI presented here have been calculated by the authors and may differ from those published in Asfar et al. (2011) due to rounding error. Outcome measures are Continuous Abstinence (CA), Point Prevalence Abstinence (PP).

**Appendix**  
**Smoking Cessation for Smokers Not Ready to Quit: Meta-analysis and Cost-effectiveness Analysis**  
**All et al.**

<sup>a</sup>Chemically-validated outcomes using expired CO <10ppm.

<sup>b</sup> Indicates studies with multiple treatment arms which have been pooled to estimate the overall effect of treatments versus control.

SNRTQ, smokers not ready to quit; CPD, cigarettes per day; CO, carbon monoxide; NRT, nicotine replacement therapy.

**Appendix**  
**Smoking Cessation for Smokers Not Ready to Quit: Meta-analysis and Cost-effectiveness Analysis**  
**All et al.**

**Appendix Table 2.** Summary of Recent Studies of Cessation Interventions for SNRTQ

| Reference, country                | Sample size | Eligibility criteria                                                                                                                                                                                 | Control / Treatment                                                | Other treatment components                                                                                             | Follow-up (months)  | Outcome                 | Smoking abstinence in treatment % (n/N) | Smoking abstinence in control % (n/N) |
|-----------------------------------|-------------|------------------------------------------------------------------------------------------------------------------------------------------------------------------------------------------------------|--------------------------------------------------------------------|------------------------------------------------------------------------------------------------------------------------|---------------------|-------------------------|-----------------------------------------|---------------------------------------|
| <b>Pharmacological</b>            |             |                                                                                                                                                                                                      |                                                                    |                                                                                                                        |                     |                         |                                         |                                       |
| Ebbert et al., 2015; 10 countries | 1,510       | Smoked $\geq 10$ cigarettes/day, no CA $> 3$ months, exhaled CO $\geq 10$ ppm, not willing/able to quit in 30 days, but were willing to reduce smoking and make attempt to quit within next 3 months | Placebo/<br>Varenicline 1 mg twice daily for 24 weeks              | Additional treatment offered if a quit date is set                                                                     | 7                   | 10-week CA <sup>a</sup> | 27.0% (205/760)                         | 9.9% (74/750)                         |
| Hughes et al., 2011; U.S.         | 218         | Daily smoking $\geq 8$ cigarettes/day, want to quit eventually but no intention to quit in 30 days, no history of varenicline use, not currently on smoking cessation                                | Placebo/<br>Varenicline 1 mg twice daily for 2–8 weeks             | All subjects receive four brief (10–15 minute) counseling sessions. Additional treatment offered if a quit date is set | 6                   | 7-day PP <sup>a</sup>   | 14% (15/107)                            | 7% (8/111)                            |
| Jardin et al., 2014; U.S.         | 157         | Daily smoking $\geq 10$ cigarettes/day, no previous use of quitline or NRT for $> 1$ day in past 6 months. Not motivated to quit in 30 days                                                          | Quitline referral only/ 2-week NRT sample and referral to quitline | –                                                                                                                      | 3                   | 7-day PP                | 15% (8/53)                              | 5% (3/51)                             |
| Carpenter et al., 2011; U.S.      | 849         | Daily smoking $\geq 10$ cigarettes/day, no non-cigarette tobacco use, no previous use of NRT, no quit attempt longer than 1 week in past year, not motivated to quit in 30 days                      | Usual care/ 2 boxes of NRT lozenges                                | All subjects receive counseling for practice quit attempt                                                              | 6                   | 7-day PP                | 16% (68/426)                            | 14% (60/423)                          |
| <b>Behavioral</b>                 |             |                                                                                                                                                                                                      |                                                                    |                                                                                                                        |                     |                         |                                         |                                       |
| Davis et al., 2011; U.S.          | 218         | Smoke a pack a day and are not ready to quit                                                                                                                                                         | 15-minute prescriptive interview/ 15-                              | Additional treatment offered if a quit date is set                                                                     | Both 1 and 6 months | PP <sup>b</sup>         | 0% (0/109)                              | 0.9% (1/109)                          |

**Appendix**  
**Smoking Cessation for Smokers Not Ready to Quit: Meta-analysis and Cost-effectiveness Analysis**  
**All et al.**

|                                           |                          |                                                                                                                                                                                                                 |                                                                                                                                                              |                                                                                                                                                   |          |                       |               |             |
|-------------------------------------------|--------------------------|-----------------------------------------------------------------------------------------------------------------------------------------------------------------------------------------------------------------|--------------------------------------------------------------------------------------------------------------------------------------------------------------|---------------------------------------------------------------------------------------------------------------------------------------------------|----------|-----------------------|---------------|-------------|
| Catley et al., 2016; U.S. <sup>c</sup>    | 255                      | Smoking $\geq 1$ cigarettes/day, exhaled CO $\geq 7$ ppm, no current use of cessation medication, no cessation plans in next 7 days, unmotivated to quit smoking                                                | minute motivational interview<br>Brief advice/<br>Arm 1:<br>Motivational interviewing/<br>Arm 2: Health education                                            | Additional treatment (varenicline, NRT patch or lozenge) offered if a quit date is set                                                            | 6        | 7-day PP <sup>d</sup> | 5.4% (11/204) | 0.0% (0/51) |
| Huang et al., 2015; China                 | 148                      | Smoked at least 5 cigarettes/week, exhaled CO $\geq 8$ ppm, not motivated/ready to quit, had a family member who would participate as a supporter, had not been in another smoking cessation program            | Usual care: cessation advice/<br>Individual, tailored MI consisting of four weekly 20-minute sessions                                                        | All subjects receive self-help manual and 25-minute group session                                                                                 | 3 months | PP <sup>a</sup>       | 2.8% (2/72)   | 0% (0/76)   |
| Danan et al., 2016; U.S.                  | 1929 SNRTQ (3,006 total) | Current smoker, in preparation (35.8%), contemplation (38.2%), or precontemplation (26.0%) stage of change                                                                                                      | Usual care/<br>Proactive mailing, telephone outreach, and offer of in-person or telephone counseling                                                         | All subjects have access to smoking cessation services through VA and state quitline services. Additional treatment offered if a quit date is set | 12       | 6-month CA            | 6.6% (63/948) | 5% (49/981) |
| Klemperer et al., 2016; U.S. <sup>c</sup> | 560                      | Smoked $\geq 10$ cigarettes per day, desire to quit someday but not ready to quit in the next 30 days, no change in CPD by more than $\pm 25\%$ , no other nicotine or tobacco products nor cessation treatment | Usual care /<br>Arm 1:<br>Motivational intervention: Three 10–15 minute counseling calls in weeks 0, 2, and 4;<br>Arm 2: Reduction intervention: Three 10–15 | –                                                                                                                                                 | 6 months | PP                    | 9.4% (35/371) | 5% (10/189) |

**Appendix**  
**Smoking Cessation for Smokers Not Ready to Quit: Meta-analysis and Cost-effectiveness Analysis**  
**All et al.**

|                                          |       |                                                                                                                                                                                                        |                                                                                                  | minute<br>counseling calls                                         |   |                 |                  |                  |  |
|------------------------------------------|-------|--------------------------------------------------------------------------------------------------------------------------------------------------------------------------------------------------------|--------------------------------------------------------------------------------------------------|--------------------------------------------------------------------|---|-----------------|------------------|------------------|--|
| Combination                              |       |                                                                                                                                                                                                        |                                                                                                  |                                                                    |   |                 |                  |                  |  |
| Chan et al.,<br>2011; China <sup>c</sup> | 1,154 | Smoke ≥2 cigarettes per day, no intention to quit in near future, but interested in reducing smoking, no contraindication to NRT, not following any other smoking cessation or reduction interventions | Cessation advice only/<br>(Arm 1 and Arm 2) Four sessions in-person counseling +8 weeks free NRT | All subjects receive baseline “Tips for Quitting Smoking” pamphlet | 6 | PP <sup>a</sup> | 8.0%<br>(74/928) | 4.4%<br>(10/226) |  |

*Note:* Outcome measures are Continuous Abstinence (CA), Point Prevalence Abstinence (PP).

<sup>a</sup>Chemically-validated outcomes of expired CO <10ppm.

<sup>b</sup>Urine analysis cotinine <100 mm,

<sup>c</sup>Indicates studies with multiple treatment arms which have been pooled to estimate the overall effect of treatments versus control.

<sup>d</sup>Saliva cotinine ≤15 ng/mL.

SNRTQ, smokers not ready to quit; CO, carbon monoxide; NRT, nicotine replacement therapy; MI, motivational interviewing

**Appendix**  
**Smoking Cessation for Smokers Not Ready to Quit: Meta-analysis and Cost-effectiveness Analysis**  
**All et al.**

**Appendix Table 3.** Estimates of Effectiveness of Cessation Interventions for SNRTQ

| Intervention                                                        | Treatment                  |                                  | Treatment  |              | Control    |              | Weight         | OR<br>M-H fixed (95% CI) | NNT       | Cost per<br>smoker | Cost per<br>quit   |
|---------------------------------------------------------------------|----------------------------|----------------------------------|------------|--------------|------------|--------------|----------------|--------------------------|-----------|--------------------|--------------------|
|                                                                     | Type                       | Duration                         | Quits      | Total        | Quits      | Total        |                |                          |           |                    |                    |
| <b>Pharmacological interventions</b>                                |                            |                                  |            |              |            |              |                |                          |           |                    |                    |
| Bollinger et al. 2000                                               | NRT inhaler                | 18 months                        | 21         | 200          | 17         | 200          | 14.20%         | 1.26 (0.65, 2.47)        | 50        | \$5,166.43         | \$258,321.69       |
| Wennike et al. 2003                                                 | NRT gum                    | 12 months                        | 19         | 205          | 7          | 206          | 5.90%          | 2.90 (1.19, 7.07)        | 17        | \$1,046.16         | \$17,784.72        |
| Hatsukami et al. 2004                                               | Bupropion                  | 6.5 months                       | 20         | 295          | 16         | 299          | 13.80%         | 1.29 (0.65, 2.53)        | 70        | \$1,436.62         | \$100,563.46       |
| Batra et al. 2005                                                   | NRT gum                    | 12 months                        | 22         | 184          | 8          | 180          | 6.60%          | 2.92 (1.26, 6.74)        | 13        | \$1,046.16         | \$13,600.08        |
| Rennard et al. 2006                                                 | NRT inhaler                | 12 months                        | 17         | 215          | 3          | 214          | 2.60%          | 6.04 (1.74, 20.92)       | 15        | \$3,444.29         | \$51,664.34        |
| Ebbert et al. 2015                                                  | Varenicline                | 6 months                         | 205        | 760          | 74         | 750          | 50.60%         | 3.37 (2.53, 4.50)        | 6         | \$1,650.05         | \$9,900.32         |
| Hughes et al. 2011                                                  | Varenicline                | 2 months                         | 15         | 107          | 8          | 111          | 6.30%          | 2.10 (0.85, 5.18)        | 15        | \$550.02           | \$8,250.26         |
| Etter et al. 2004 <sup>a</sup>                                      | NRT inhaler, gum, or patch | 6 months                         | 31         | 265          | 25         | 269          | 0.00%          | 1.29 (0.74, 2.26)        | 42        | \$833.29           | \$34,998.10        |
| Carpenter et al. 2011 <sup>a</sup>                                  | NRT lozenges               | 2 boxes                          | 68         | 426          | 60         | 423          | 0.00%          | 1.15 (0.79, 1.67)        | 56        | \$64.56            | \$3,615.36         |
| Jardin et al. 2014 <sup>a</sup>                                     | NRT sample                 | 2 weeks                          | 8          | 53           | 3          | 51           | 0.00%          | 2.84 (0.71, 11.40)       | 11        | \$85.78            | \$943.58           |
| Pooled pharmacological                                              |                            |                                  | <b>319</b> | <b>1,966</b> | <b>133</b> | <b>1,960</b> | <b>100.00%</b> | <b>2.72 (2.19, 3.37)</b> | <b>10</b> | <b>\$2,021.79</b>  | <b>\$19,510.24</b> |
| Heterogeneity: $\chi^2 = 13.78$ , $df=6$ ( $p=0.03$ ); $I^2 = 56\%$ |                            |                                  |            |              |            |              |                |                          |           |                    |                    |
| Test for overall effect: $z = 9.10$ ( $p < 0.00001$ )               |                            |                                  |            |              |            |              |                |                          |           |                    |                    |
| <b>Behavioral interventions</b>                                     |                            |                                  |            |              |            |              |                |                          |           |                    |                    |
| Glasgow et al. 2009                                                 | RC + newsletters           | 4 sessions, telephone + mailings | 11         | 164          | 7          | 156          | 71.10%         | 1.53 (0.58, 4.05)        | 45        | \$268.48           | \$12,081.40        |
| Davis et al. 2011                                                   | MI                         | 1 session, telephone             | 0          | 109          | 1          | 109          | 15.90%         | 0.33 (0.01, 8.20)        | –         | \$86.98            | –                  |
| Catley et al. 2016 <sup>b</sup>                                     | MI or HE                   | 4 sessions, in-person            | 11         | 204          | 0          | 51           | 8.00%          | 6.12 (0.35, 105.62)      | 19        | \$275.13           | \$5,227.51         |
| Huang et al. 2016                                                   | MI                         | 4 sessions, in-person            | 2          | 72           | 0          | 76           | 5.00%          | 5.43 (0.26, 114.97)      | 36        | \$275.13           | \$9,904.75         |



**Appendix**  
**Smoking Cessation for Smokers Not Ready to Quit: Meta-analysis and Cost-effectiveness Analysis**  
**All et al.**

|                                                                    |                                 |                                        |            |              |           |            |                |                          |           |                 |                    |
|--------------------------------------------------------------------|---------------------------------|----------------------------------------|------------|--------------|-----------|------------|----------------|--------------------------|-----------|-----------------|--------------------|
| Danan et al. 2016 <sup>a</sup>                                     | Mailings and telephone outreach | 1 session, telephone + mailings        | 63         | 948          | 49        | 981        | 0.00%          | 1.35 (0.92, 1.99)        | 61        | \$101.00        | \$6,160.75         |
| Klemperer et al. 2016 <sup>a,b</sup>                               | MI                              | 4 sessions, telephone                  | 35         | 371          | 10        | 189        | 0.00%          | 1.86 (0.90, 3.85)        | 24        | \$254.46        | \$6,107.03         |
| Pooled behavioral                                                  |                                 |                                        | <b>24</b>  | <b>549</b>   | <b>8</b>  | <b>392</b> | <b>100.00%</b> | <b>1.90 (0.86, 4.23)</b> | <b>47</b> | <b>\$240.48</b> | <b>\$11,415.74</b> |
| Heterogeneity: $\chi^2 = 2.43$ , $df=3$ ( $p=0.49$ ); $I^2 = 0\%$  |                                 |                                        |            |              |           |            |                |                          |           |                 |                    |
| Test for overall effect: $z = 1.58$ ( $p=0.11$ )                   |                                 |                                        |            |              |           |            |                |                          |           |                 |                    |
| Combination interventions                                          |                                 |                                        |            |              |           |            |                |                          |           |                 |                    |
| Carpenter et al. 2003                                              | RC + NRT gum or patches         | 4 sessions, in-person + 6 months NRT   | 4          | 32           | 3         | 35         | 7.20%          | 1.52 (0.31, 7.40)        | 25        | \$1,108.42      | \$27,710.51        |
| Carpenter et al. 2004 <sup>b</sup>                                 | RC + NRT gum or patches         | 4 sessions, telephone + 1.5 months NRT | 83         | 409          | 9         | 207        | 27.20%         | 5.60 (2.75, 11.39)       | 6         | \$462.78        | \$2,776.69         |
| Chan et al. 2011 <sup>b</sup>                                      | Counseling + NRT choice         | 4 sessions, in-person + 2 months NRT   | 74         | 928          | 10        | 226        | 42.30%         | 1.87 (0.95, 3.68)        | 28        | \$552.89        | \$15,481.05        |
| Joseph et al. 2008                                                 | RC + NRT gum                    | 5 sessions, telephone + 18 months NRT  | 9          | 78           | 9         | 74         | 23.30%         | 0.94 (0.35, 2.52)        | –         | \$2,098.83      | –                  |
| Pooled combination                                                 |                                 |                                        | <b>170</b> | <b>1,447</b> | <b>31</b> | <b>542</b> | <b>100.00%</b> | <b>2.64 (1.76, 3.97)</b> | <b>16</b> | <b>\$928.59</b> | <b>\$14,662.36</b> |
| Heterogeneity: $\chi^2 = 9.99$ , $df=3$ ( $p=0.02$ ); $I^2 = 70\%$ |                                 |                                        |            |              |           |            |                |                          |           |                 |                    |
| Test for overall effect: $z = 4.68$ ( $p < 0.00001$ )              |                                 |                                        |            |              |           |            |                |                          |           |                 |                    |

*Note:* ORs are calculated using the equation:  $OR = (\% \text{Quit}_{\text{treatment}} / (1 - \% \text{Quit}_{\text{treatment}})) / (\% \text{Quit}_{\text{control}} / (1 - \% \text{Quit}_{\text{control}}))$ . NNT is calculated using the equation:  $NNT = N_{\text{treatment}} / (\text{Quit}_{\text{treatment}} - \% \text{Quit}_{\text{control}} * N_{\text{treatment}})$ . Cost per smoker is calculated by multiplying treatment costs in Table 1 by duration of treatment. Where individuals were offered choice in NRT, average monthly cost of NRT was used. Additional detailed assumptions used to develop costs in Table 1 are described in Appendix Table 5. Cost per quit is calculated by multiplying NNT by cost per smoker.

<sup>a</sup>Indicates study used self-reported cessation outcomes. Pooled calculations include only studies where cessation outcomes are bio-chemically verified through saliva, urine, or exhaled cotinine levels.

<sup>b</sup>Indicates studies with multiple treatment arms that have been pooled to estimate the overall effect of treatments versus control.

NRT, nicotine replacement therapy; RC: reduction counselling; MI: motivational interviewing; HE: health education; SNRTQ, smokers not ready to quit; M-H, Mantel-Haenszel method to estimate pooled ORs, assuming a fixed effects model; NNT, number needed to treat.

**Appendix**  
**Smoking Cessation for Smokers Not Ready to Quit: Meta-analysis and Cost-effectiveness Analysis**  
**All et al.**

**Appendix Table 4.** Sensitivity Analysis of Cessation Interventions for SNRTQ

| Reference              | Treatment details/ Actual use                                                                                                                                                                               | Min cost assumptions                                                                              | Max cost assumptions                                                                                             | Minimum cost per smoker | Maximum cost per smoker | Number needed to treat | Minimum cost per quit | Maximum cost per quit |
|------------------------|-------------------------------------------------------------------------------------------------------------------------------------------------------------------------------------------------------------|---------------------------------------------------------------------------------------------------|------------------------------------------------------------------------------------------------------------------|-------------------------|-------------------------|------------------------|-----------------------|-----------------------|
| <b>Pharmacological</b> |                                                                                                                                                                                                             |                                                                                                   |                                                                                                                  |                         |                         |                        |                       |                       |
| Bollinger et al. 2000  | Recommended 6 to 12 cartridges per day. Encouraged to decrease after 4 months, but allowed to continue for 18 months. Actual use: Average of 4.5 cartridges a day at 2 weeks and 2.6 a day at 18 months.    | 4 cartridges per day; 168 cartridges last approximately 6 weeks.                                  | If 12 cartridges/day, then 168 cartridges will last 2 weeks.                                                     | \$3,731.31              | \$11,193.94             | 50                     | \$186,565.67          | \$559,697.00          |
| Wennike et al. 2003    | Subjects allowed to use gum freely, up to 12 months. Actual use: Mean daily gum usage at 2 weeks: 7.8 pieces (2 mg) and 9.8 pieces (4 mg), at 12 months: 10.8 pieces (2 mg) and 10.6 pieces (4 mg).         | If 7 pieces/day; 100 pack will last approximately 2 weeks. 24 packs will be needed for 12 months. | If 10 pieces/day; 100 pack will last approximately 10 days. Approximately 36 packs will be needed for 12 months. | \$697.44                | \$1,046.16              | 17                     | \$11,880.96           | \$17,821.43           |
| Hatsukami et al. 2004  | 26 weeks bupropion or placebo (150 mg once for first 3 days; 150 mg, twice daily thereafter); each month, asked if willing to quit, if so enrolled into cessation arm, which includes 7 weeks of bupropion. | Approximately 3 months of Bupropion.                                                              | 6.5 months of Bupropion.                                                                                         | \$663.06                | \$1,436.62              | 70                     | \$46,416.54           | \$100,569.16          |
| Batra et al. 2005      | Participants instructed to use as desired for up to 12 months, 6 to 24 pieces per day. Actual use: Mean daily usage at 2 weeks: 6.5 pieces; at 4 months: 6.5 pieces; at 12 months: 6.1 pieces.              | If 6.5 pieces/day; 100 pack lasts ~2 weeks, so 2 packs/month.                                     | If 10 pieces/day; 100 pack lasts 10 days. So 3 packs per month is 36 packs a year.                               | \$697.44                | \$1,046.16              | 13                     | \$9,284.25            | \$13,926.37           |
| Rennard et al. 2006    | Subjects allowed to use inhaler freely for up to 1 year, with a recommendation of 6 to 12 uses per day.                                                                                                     | 4 cartridges per day; 168 cartridges last approximately 6 weeks.                                  | If 12 cartridges/day, then 168 cartridges will last 2 weeks.                                                     | \$2,487.54              | \$7,462.63              | 15                     | \$38,239.83           | \$114,719.50          |

**Appendix**  
**Smoking Cessation for Smokers Not Ready to Quit: Meta-analysis and Cost-effectiveness Analysis**  
**All et al.**

|                                    |                                                                                                                                                             |                                                                                |                                                                                 |                   |                   |           |                    |                    |  |
|------------------------------------|-------------------------------------------------------------------------------------------------------------------------------------------------------------|--------------------------------------------------------------------------------|---------------------------------------------------------------------------------|-------------------|-------------------|-----------|--------------------|--------------------|--|
|                                    | Actual use: Mean inhaler use at 4 months was 6.4 uses per day, at 12 months was 5.8 uses per day.                                                           |                                                                                |                                                                                 |                   |                   |           |                    |                    |  |
| Ebbert et al. 2015                 | Subjects were given Varenicline, 1 mg twice daily for 6 months.                                                                                             | Varenicline, 1 pack per month, for 6 months.                                   | Varenicline, 1 pack per month, for 6 months.                                    | \$1,650.05        | \$1,650.05        | 6         | \$9,645.47         | \$9,645.47         |  |
| Hughes et al. 2011                 | Subjects were given Varenicline, 1 mg twice daily for 2 months.                                                                                             | Varenicline, 1 pack per month, for 2 months.                                   | Varenicline, 1 pack per month, for 2 months.                                    | \$550.02          | \$550.02          | 15        | \$8,074.86         | \$8,074.86         |  |
| Etter et al. 2004 <sup>a</sup>     | Participants could choose between patch, gum, and inhaler and could switch between products or use multiple products. Products were available for 6 months. | 6-month supply of patches.                                                     | 6-month supply of inhalers.                                                     | \$254.64          | \$1,722.14        | 42        | \$10,590.44        | \$71,623.73        |  |
| Carpenter et al. 2011 <sup>a</sup> | Subjects were given 2 boxes of NRT lozenges                                                                                                                 | 2 boxes of NRT lozenges.                                                       | 2 boxes of NRT lozenges.                                                        | \$64.56           | \$64.56           | 56        | \$3,615.36         | \$3,615.36         |  |
| Jardin et al. 2014 <sup>a</sup>    | Subjects were given both a 2-week supply of both 14 mg NRT patch and 4 mg lozenge.                                                                          | 2-week supply of NRT patch + 2-week supply of NRT lozenges.                    | 2-week supply of NRT patch + 2-week supply of NRT lozenges.                     | \$85.78           | \$85.78           | 11        | \$931.18           | \$931.18           |  |
| Pooled pharmacological             |                                                                                                                                                             |                                                                                |                                                                                 | <b>\$1,642.78</b> | <b>\$2,982.17</b> | <b>10</b> | <b>\$16,427.82</b> | <b>\$29,821.69</b> |  |
| Behavioral                         |                                                                                                                                                             |                                                                                |                                                                                 |                   |                   |           |                    |                    |  |
| Glasgow et al. 2009                | 4 phone counseling sessions + 4 tailored newsletters + 1 targeted newsletter                                                                                | Lowest-cost 4 phone sessions + printed mailings                                | From estimated marginal cost/patient in Glasgow et al. 2009.                    | \$104.25          | \$795.44          | 45        | \$4,695.65         | \$35,828.41        |  |
| Davis et al. 2011                  | One 15-minute interview                                                                                                                                     | One 15-minute counseling/MI session from study reporting lowest cost.          | One 15-minute counseling/MI session from study reporting highest cost.          | \$41.70           | \$134.82          | –         | –                  | –                  |  |
| Catley et al. 2016 <sup>b</sup>    | Individual MI/counseling, 4 sessions, approximately 20 minutes each (2 sessions in person, 2 sessions telephone).                                           | 4 In-person/telephone Counseling/MI sessions from study reporting lowest cost. | 4 In-person/telephone Counseling/MI sessions from study reporting highest cost. | \$83.40           | \$795.44          | 19        | \$1,584.60         | \$15,113.36        |  |

**Appendix**  
**Smoking Cessation for Smokers Not Ready to Quit: Meta-analysis and Cost-effectiveness Analysis**  
**All et al.**

|                                      |                                                                                                                                                                                |                                                                                                     |                                                                                                       |                |                 |           |                   |                    |
|--------------------------------------|--------------------------------------------------------------------------------------------------------------------------------------------------------------------------------|-----------------------------------------------------------------------------------------------------|-------------------------------------------------------------------------------------------------------|----------------|-----------------|-----------|-------------------|--------------------|
| Huang et al. 2016                    | Four 20-minute individual MI sessions.                                                                                                                                         | 4 In-person counseling/MI sessions from study reporting lowest cost.                                | 4 In-person counseling/MI sessions from study reporting highest cost.                                 | \$165.26       | \$385.00        | 36        | \$5,949.50        | \$13,860.00        |
| Danan et al. 2016 <sup>a</sup>       | Pro-active mailing and one telephone call.                                                                                                                                     | Cost of mailing + taking calls only.                                                                | Cost of mailing, taking calls + cost of one phone session from study reporting highest cost.          | \$20.85        | \$155.67        | 61        | \$1,263.13        | \$9,430.74         |
| Klemperer et al. 2016 <sup>a,b</sup> | Three telephone sessions, each 10–15 minutes duration.                                                                                                                         | 4 phone counseling/MI sessions from study reporting lowest cost.                                    | 4 phone counseling/MI sessions from study reporting highest cost.                                     | \$83.40        | \$795.44        | 24        | \$2,001.60        | \$19,090.56        |
| <b>Pooled behavioral Combination</b> |                                                                                                                                                                                |                                                                                                     |                                                                                                       | <b>\$95.69</b> | <b>\$669.88</b> | <b>47</b> | <b>\$4,497.30</b> | <b>\$31,484.33</b> |
| Carpenter et al. 2003                | 5 in-person individual sessions (15–20 minutes) on reduction + NRT 24 weeks.                                                                                                   | 4 In-person counseling/MI sessions from study reporting lowest cost + lowest cost NRT for 6 months. | 4 In-person counseling/MI sessions from study reporting highest cost + highest cost NRT for 6 months. | \$419.90       | \$2,107.14      | 25        | \$10,688.47       | \$53,636.41        |
| Carpenter et al. 2004 <sup>b</sup>   | Reduction intervention: three 15-minute reduction counseling calls + 6 weeks of NRT gum or patches<br>Motivation intervention: three 15-minute calls of reduction MI. (No NRT) | 4 Telephone counseling/MI sessions from study reporting lowest cost. No NRT.                        | 4 Telephone counseling/MI sessions from study reporting highest cost + NRT gum for 2.5 months.        | \$83.40        | \$882.62        | 6         | \$500.40          | \$5,295.72         |
| Chan et al. 2011 <sup>b</sup>        | 3 face-to-face counseling sessions + 8 weeks NRT (either gum or patch)                                                                                                         | 4 In-person counseling/MI sessions from study reporting lowest cost + 2                             | 4 In-person counseling/MI sessions from study reporting highest cost + 2                              | \$250.14       | \$559.36        | 28        | \$7,047.58        | \$15,759.46        |

**Appendix**  
**Smoking Cessation for Smokers Not Ready to Quit: Meta-analysis and Cost-effectiveness Analysis**  
**All et al.**

|                    |                                                                                                                            |                                                                                                                                                                                             |                                                                                                                                                                                         |                 |                   |           |                   |                    |
|--------------------|----------------------------------------------------------------------------------------------------------------------------|---------------------------------------------------------------------------------------------------------------------------------------------------------------------------------------------|-----------------------------------------------------------------------------------------------------------------------------------------------------------------------------------------|-----------------|-------------------|-----------|-------------------|--------------------|
| Joseph et al. 2008 | 5 In-person sessions + 5 phone sessions + NRT (either 4 mg gum, 6 pieces/day or switch to patches if >6 pieces of gum/day) | months NRT patch.<br>4 In-person counseling/MI sessions from study reporting lowest cost + 4 Telephone counseling/MI sessions from study reporting lowest cost + NRT patches for 18 months. | months NRT gum.<br>4 In-person counseling/MI sessions from study reporting highest cost + 4 telephone counseling/MI sessions from study reporting highest cost + NRT gum for 18 months. | \$1,012.58      | \$2,749.68        | –         | –                 | –                  |
| Pooled combination |                                                                                                                            |                                                                                                                                                                                             |                                                                                                                                                                                         | <b>\$394.66</b> | <b>\$1,269.07</b> | <b>16</b> | <b>\$6,158.89</b> | <b>\$19,804.52</b> |

*Note:* Additional intervention details and calculations of point estimates for NNT, ORs, cost per smoker, and cost per quit are described in Appendix Table 3. All cost estimates for interventions are based on values reported in Table 1, which are based on cost assumptions described in Appendix Table 5.

<sup>a</sup>Indicates study used self-reported cessation outcomes. Pooled calculations include only studies where cessation outcomes are bio-chemically verified through saliva, urine, or exhaled cotinine levels; weights from Table 2 are used for all pooled estimates.

<sup>b</sup>Indicates studies with multiple treatment arms which have been pooled to estimate the overall effect of treatments versus control.

SNRTQ, smokers not ready to quit; NRT, nicotine replacement therapy; MI, motivational interviewing; NNT, number needed to treat.

**Appendix**  
**Smoking Cessation for Smokers Not Ready to Quit: Meta-analysis and Cost-effectiveness Analysis**  
**All et al.**

**Appendix Table 5.** Detailed Costs of Behavioral Cessation Interventions for General Smokers

| <b>Interventions</b>                           | <b>Total cost/smoker (2016 \$)</b> | <b>Treatment details</b>                                                    | <b>References</b>     |
|------------------------------------------------|------------------------------------|-----------------------------------------------------------------------------|-----------------------|
| Counseling or MI (In-person, about 4 sessions) | \$385.00                           | Five 1-hour group sessions                                                  | Barnett et al. 2014   |
|                                                | \$165.26                           | Four 30-minute individual, in-person sessions                               | Barnett et al. 2014   |
| Average cost                                   | \$275.13                           |                                                                             |                       |
| Counseling or MI (Telephone, 1 session)        | \$84.42                            | One 15-minute session telephone motivational interviewing                   | Hollis et al. 2007    |
|                                                | \$134.82                           | One 30-minute call telephone motivational interviewing + One follow-up call | Hollis et al. 2007    |
|                                                | \$41.70                            | One single telephone counseling session                                     | McAlister et al. 2004 |
| Average cost                                   | \$86.98                            |                                                                             |                       |
| Counseling or MI (Telephone, about 4 sessions) | \$166.32                           | Five 30-minute calls telephone motivational interviewing                    | Hollis et al. 2007    |
|                                                | \$88.14                            | Four sessions telephone counseling                                          | Richter et al. 2015   |
|                                                | \$139.00                           | Two to six counseling sessions                                              | McAlister et al. 2004 |
|                                                | \$83.40                            | Around four counseling sessions                                             | McAlister et al. 2004 |
|                                                | \$795.44                           | Four telephone sessions + five newsletters                                  | Glasgow et al. 2009   |
| Average cost                                   | \$254.46                           |                                                                             |                       |
| Mailings and follow-up calls only              | \$20.85                            | Mailing printed materials and taking calls                                  | McAlister et al. 2004 |
|                                                | \$7.18                             | Provider talks to patient about cessation and nicotine withdrawal           | Ruger et al. 2008     |
| Average cost                                   | \$14.02                            |                                                                             |                       |

*Notes:* All cost estimates have been standardized to 2016 U.S. dollars. Costs of behavioral interventions are averaged by intervention type for use in estimating cost per smoker calculations. Costs for in-person sessions from Barnett et al. 2013. Costs for telephone sessions from Hollis et al. 2007, McAlister et al. 2004, Richter et al. 2015 and Glasgow et al. 2009. Costs for printed materials from McAlister et al. 2004 and Ruger et al. 2009.

MI, motivational interviewing.

**Appendix**  
**Smoking Cessation for Smokers Not Ready to Quit: Meta-analysis and Cost-effectiveness Analysis**  
**All et al.**

**Appendix Table 6.** Summary of Effectiveness of Cessation Interventions for General Smokers

| <b>Intervention description</b>                             | <b>Control description</b> | <b>Follow-up</b> | <b>Control</b> | <b>Treatment</b> | <b>NNT</b> | <b>References</b>           |
|-------------------------------------------------------------|----------------------------|------------------|----------------|------------------|------------|-----------------------------|
| <b>Pharmacological interventions</b>                        |                            |                  |                |                  |            |                             |
| NRT + limited behavioral support                            | Placebo/control            | 6–24 months      | (40/1,000)     | (64/1,000)       | 42         | Stead et al., 2012          |
| NRT + intensive behavioral support                          | Placebo/control            | 6–24 months      | (150/1,000)    | (240/1,000)      | 11         | Stead et al., 2012          |
| Bupropion                                                   | Placebo/control            | 6+ months        | (115/1,000)    | (187/1,000)      | 14         | Hughes et al., 2014         |
| Varenicline                                                 | Placebo/control            | 24+ weeks        | (111/1,000)    | (250/1,000)      | 7          | Cahill et al., 2016         |
| <b>Behavioral interventions</b>                             |                            |                  |                |                  |            |                             |
| Telephone counseling – Callers to quitlines                 | Usual care                 | 6+ months        | (76/1,000)     | (105/1,000)      | 34         | Stead et al., 2013          |
| Telephone counseling - Pro-active calls                     | Usual care                 | 6+ months        | (97/1,000)     | (123/1,000)      | 38         | Stead et al., 2013          |
| In-person individual counseling                             | Usual care                 | 6+ months        | (305/3,922)    | (431/3,933)      | 31         | Lancaster and Stead, 2005   |
| Motivational interviewing                                   | Brief advice or usual care | 6+ months        | (104/1,000)    | (131/1,000)      | 37         | Lindson-Hawley et al., 2015 |
| <b>Combination interventions</b>                            |                            |                  |                |                  |            |                             |
| Combination of pharmacological and behavioral interventions | Control                    | 6 months         | (86/1,000)     | (157/1,000)      | 14         | Stead et al., 2016          |

*Note:* Summaries from most recent Cochrane reviews of different types of interventions for smoking cessation among a general population of smokers are presented. Each meta-analysis calculated treatment and control quits using the strictest definitions of abstinence available in each study reviewed. The authors calculate the number needed to treat (NNT) for each meta-analysis included here. Nicotine replacement therapy is denoted as NRT.

**Appendix**  
**Smoking Cessation for Smokers Not Ready to Quit: Meta-analysis and Cost-effectiveness Analysis**  
**All et al.**

**Appendix Table 7.** Subgroup Analysis: Estimates of Effectiveness and Cost-Effectiveness for Pharmacological Interventions for SNRTQ

| Intervention                                                   | Treatment   |           | Treatment  |            | Control   |            | Weight         | ORo<br>M-H fixed (95% CI) | NNT       | Cost per smoker   | Cost per quit       |
|----------------------------------------------------------------|-------------|-----------|------------|------------|-----------|------------|----------------|---------------------------|-----------|-------------------|---------------------|
|                                                                | Type        | Duration  | Quits      | Total      | Quits     | Total      |                |                           |           |                   |                     |
| <b>NRT inhaler</b>                                             |             |           |            |            |           |            |                |                           |           |                   |                     |
| Bollinger 2000                                                 | NRT inhaler | 18 months | 21         | 200        | 17        | 200        | 84.60%         | 1.26 (0.65, 2.47)         | 50        | \$5,166.43        | \$258,321.69        |
| Rennard 2006                                                   | NRT inhaler | 12 months | 17         | 215        | 3         | 214        | 15.40%         | 6.04 (1.74, 20.92)        | 15        | \$3,444.29        | \$51,664.34         |
| Pooled NRT inhaler                                             |             |           | <b>38</b>  | <b>415</b> | <b>20</b> | <b>414</b> | <b>100.00%</b> | <b>2.00 (1.14, 3.51)</b>  | <b>37</b> | <b>\$4,901.22</b> | <b>\$180,280.41</b> |
| Heterogeneity: $\chi^2=4.83$ , $df=1$ ( $p=0.03$ ); $I^2=79\%$ |             |           |            |            |           |            |                |                           |           |                   |                     |
| Test for overall effect: $z=2.41$ ( $p=0.02$ )                 |             |           |            |            |           |            |                |                           |           |                   |                     |
| <b>NRT gum</b>                                                 |             |           |            |            |           |            |                |                           |           |                   |                     |
| Wennike 2003                                                   | NRT gum     | 12 months | 19         | 205        | 7         | 206        | 47.10%         | 2.90 (1.19, 7.07)         | 17        | \$1,046.16        | \$17,784.72         |
| Batra 2005                                                     | NRT gum     | 12 months | 22         | 184        | 8         | 180        | 52.90%         | 2.92 (1.26, 6.74)         | 13        | \$1,046.16        | \$13,600.08         |
| Pooled NRT gum                                                 |             |           | <b>41</b>  | <b>389</b> | <b>15</b> | <b>386</b> | <b>100.00%</b> | <b>2.91 (1.58, 5.36)</b>  | <b>15</b> | <b>\$1,046.16</b> | <b>\$15,295.14</b>  |
| Heterogeneity: $\chi^2=0.00$ , $df=1$ ( $p=0.99$ ); $I^2=0\%$  |             |           |            |            |           |            |                |                           |           |                   |                     |
| Test for overall effect: $z=3.44$ ( $p=0.0006$ )               |             |           |            |            |           |            |                |                           |           |                   |                     |
| <b>Varenicline</b>                                             |             |           |            |            |           |            |                |                           |           |                   |                     |
| Ebbert 2015                                                    | Varenicline | 6 months  | 205        | 760        | 74        | 750        | 89.00%         | 3.37 (2.53, 4.50)         | 6         | \$1,650.05        | \$9,900.32          |
| Hughes 2011                                                    | Varenicline | 2 months  | 15         | 107        | 8         | 111        | 11.00%         | 2.10 (0.85, 5.18)         | 15        | \$550.02          | \$8,250.26          |
| Pooled Varenicline                                             |             |           | <b>220</b> | <b>867</b> | <b>82</b> | <b>861</b> | <b>100.00%</b> | <b>3.23 (2.46, 4.25)</b>  | <b>6</b>  | <b>\$1,529.05</b> | <b>\$9,822.58</b>   |
| Heterogeneity: $\chi^2=0.96$ , $df=1$ ( $p=0.33$ ); $I^2=0\%$  |             |           |            |            |           |            |                |                           |           |                   |                     |
| Test for overall effect: $z=8.38$ ( $p<0.00001$ )              |             |           |            |            |           |            |                |                           |           |                   |                     |

Note: ORs are calculated using the equation:  $OR = (\%Quit_{treatment} / (1 - \%Quit_{treatment})) / (\%Quit_{control} / (1 - \%Quit_{control}))$ . NNT is calculated using the equation:  $NNT = N_{treatment} / (Quit_{treatment} - \%Quit_{control} * N_{treatment})$ . Cost per smoker is calculated by multiplying treatment costs in Table 1 by duration of treatment. Where individuals were offered choice in NRT, average monthly cost of NRT was used. Additional detailed assumptions used to develop costs in Table 1 are described in Appendix Table 5. Cost per quit is calculated by multiplying NNT by cost per smoker.

Pooled NRT inhaler values come from Bolliger et al. 2000 and Rennard et al. 2006. Pooled NRT gum values come from Wennike et al. 2003 and Batra et al. 2005. Pooled varenicline values come from Ebbert et al. 2015 and Hughes et al. 2011.

SNRTQ, smokers not ready to quit; M-H, Mantel-Haenszel method to estimate pooled ORs, assuming a fixed effects model; NNT, number needed to treat; NRT, nicotine replacement therapy.



**Appendix Table 8.** PICO Statement

| <b>PICO Statement</b>      |                                                                                                                                                                                                                                                                                                                                                                                                            |
|----------------------------|------------------------------------------------------------------------------------------------------------------------------------------------------------------------------------------------------------------------------------------------------------------------------------------------------------------------------------------------------------------------------------------------------------|
| <b>Population</b>          | Smokers not ready/willing to quit. This includes smokers who are not ready to quit at the time of the study, smokers who do not wish to quit but are willing to reduce, smokers who are not ready to quit within 30 days, smokers who are not ready to quit within 6 months.                                                                                                                               |
| <b>Intervention</b>        | Pharmacological, behavioral, and combination interventions. This includes reduction interventions which include cessation as a secondary outcome.                                                                                                                                                                                                                                                          |
| <b>Comparison</b>          | Placebo, usual care, or no treatment.                                                                                                                                                                                                                                                                                                                                                                      |
| <b>Outcome of interest</b> | Smoking cessation, measured as 7-day point-prevalence 6 months after completion of treatment, biochemically verified through saliva or exhaled cotinine. Where this measure is not available, other measures of cessation are included, such as 1-day point-prevalence, continuous abstinence, cessation at longest point in time following conclusion of treatment, and self-reported cessation outcomes. |

*Note:*  $I^2$  test for heterogeneity and moderation analysis are conducted to assess how variation in PICO characteristics might influence the estimated pooled effect size.

Appendix Figure 1. Funnel plots for pharmacological, behavioral, and combination interventions.

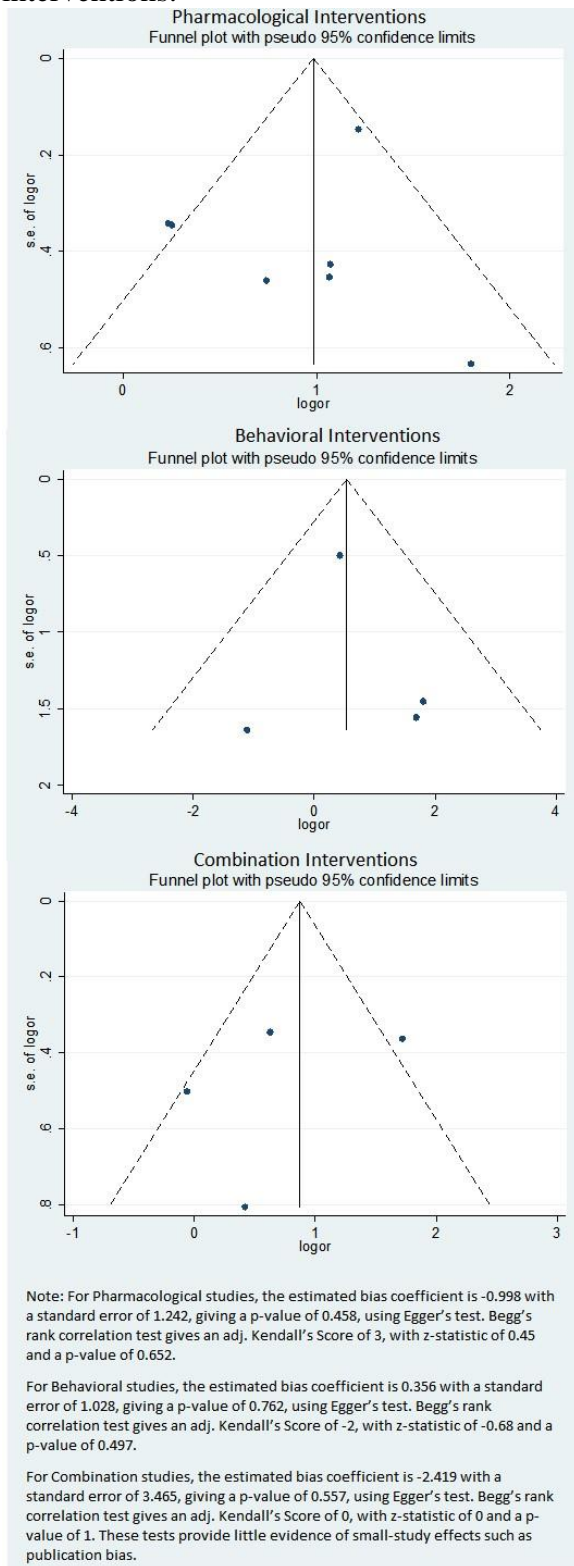

Supplement: NIHMS974504-supplement.pdf [file NIHMS974504-supplement.pdf]
